# Supplementary material for: TNFα sensitizes neuroblastoma cells to FasL-, cisplatin- and etoposide-induced cell death by NF-κB-mediated expression of Fas
Source: Springer Nature journal article supplement (doi:10.1186/s12943-015-0329-x), 2015-03-18

A

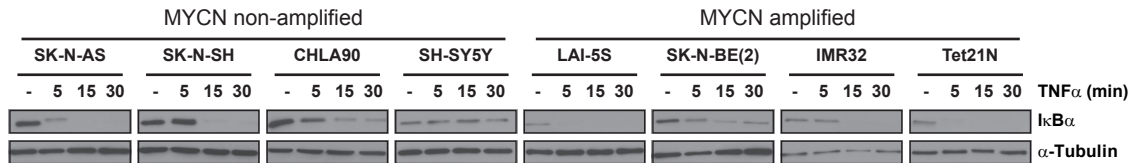

B

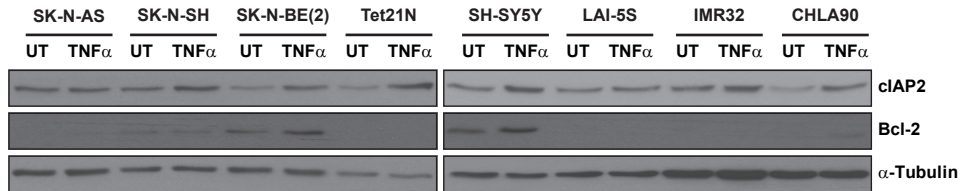

Supplement: MOESM2 [file 9763004]
